# Supplementary material for: Machine-Learning Techniques for Feature Selection and Prediction of Mortality in Elderly CABG Patients
Source: MDPI journal article supplement (doi:10.3390/healthcare9050547), 2021-05-07
Supplement: s1 [file s1]

Appendix A. ICD-9-CM and ICD-10-CM code used for diagnosis in this study.

| Variables                                    | ICD_9_CM                      | ICD_10_CM                                                                                                                                                                        |
|----------------------------------------------|-------------------------------|----------------------------------------------------------------------------------------------------------------------------------------------------------------------------------|
| Ischemic stroke                              | 433–434, 436, 437.1           | I63- 64                                                                                                                                                                          |
| Hypertension                                 | 401–405                       | I10–I14                                                                                                                                                                          |
| Hyperlipidemia                               | 272.0–272.4                   | E78                                                                                                                                                                              |
| Cardiogenic shock                            | 785.51                        | R57.0                                                                                                                                                                            |
| Liver cirrhosis                              | 571                           | K73.9, K73.0–K75.4, K74.1, K74.2, K74.5, K74.69                                                                                                                                  |
| Diabetes mellitus (DM)                       | 250                           | E10–E14                                                                                                                                                                          |
| Atrial fibrillation (AF)                     | 427.31                        | I48                                                                                                                                                                              |
| Myocardial infarction (MI)                   | 410–411                       | I21–I22                                                                                                                                                                          |
| Acute coronary syndrome (ACS)                | 411.1 and 411.8               | I20.0, I24.0, I24.8, I24.9                                                                                                                                                       |
| Transient ischemic attack (TIA)              | 435                           | G450                                                                                                                                                                             |
| Congestive heart failure (CHF)               | 428.0, 428.1, 428.9           | I50                                                                                                                                                                              |
| Peripheral vascular disease (PVD)            | 249.7, 250.7, 443, 447, 785.4 | I70, I71, I73.9                                                                                                                                                                  |
| Coronary artery disease (CAD)                | 410–414                       | I43, E78, I130.8, E78.4, I42.2, I27.2, I71.2, I42.1, I30.9, I71, I10, I33, I31.3, I26, I11, I34, I35.8, I07.1, Q25.3, I35I70, I25.1, I25.8, I25.6, I20.9, I24.5, I24.9, I54, I25 |
| Chronic kidney disease (CKD)                 | 585.4–585.5                   | N18.4, N18.5                                                                                                                                                                     |
| Chronic obstructive pulmonary disease (COPD) | 491–492, 494, 496             | J40–J44 and J47                                                                                                                                                                  |
| Renal disease                                | 586, 585, 593.9               | N18, N18.1–N18.5, N18.9                                                                                                                                                          |
| Intracranial bleeding                        |                               |                                                                                                                                                                                  |

|                       |                                                 |                                              |
|-----------------------|-------------------------------------------------|----------------------------------------------|
|                       | 4260, 426.12–426.13, 42                         | I442, I441, I452, I453                       |
| Malignant dysrhythmia | 6.51–426.54, 4271, 4274,<br>427.41–427.42, 4275 | I470, I472, I473, I4901,<br>I4902            |
| Acute pancreatitis    | 577.0                                           | B252, K850, K851, K85<br>2, K853, K858, K859 |
| Acute kidney failure  | 584, 584.5–584.9                                | N17, N17.0–N17.2, N17<br>8, N179             |

---
